# Supplementary material for: Design of Inhibitors of the Intrinsically Disordered Protein NUPR1: Balance between Drug Affinity and Target Function
Source: MDPI journal article supplement (doi:10.3390/biom11101453), 2021-10-03

## **Supplementary Information**

### **Design of inhibitors of the intrinsically disordered protein NUPR1: balance between drug affinity and target function**

Bruno Rizzuti, Wenjun Lan, Patricia Santofimia-Castaño, Zhengwei Zhou, Adrián  
Velázquez-Campoy, Olga Abián, Ling Peng, José L. Neira, Yi Xia and Juan L. Iovanna

#### **Table of Contents**

- Scheme S1: Synthesis of ZZW-115-derived compounds.
- Fig. S1: capacity of ZZW-115-derived compounds to perform nuclear translocation
- Fig. S2: capacity of ZZW-115-derived compounds to sensitize 5-FU induced DNA damage
- $^1\text{H}$ ,  $^{13}\text{C}$ -NMR spectra of the compounds
- HPLC spectra of the compounds

Scheme S1. Synthesis of ZZW-115-derived compounds.

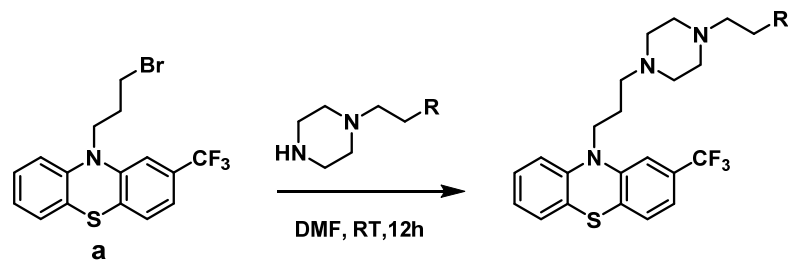

| Name           | R | Yield (%) | Name           | R | Yield (%) |
|----------------|---|-----------|----------------|---|-----------|
| <b>ZZW-129</b> |   | 68        | <b>ZZW-143</b> |   | 69        |
| <b>ZZW-130</b> |   | 79        | <b>ZZW-144</b> |   | 63        |
| <b>ZZW-131</b> |   | 74        | <b>ZZW-145</b> |   | 76        |
| <b>ZZW-132</b> |   | 71        | <b>ZZW-148</b> |   | 70        |
| <b>ZZW-142</b> |   | 76        |                |   |           |

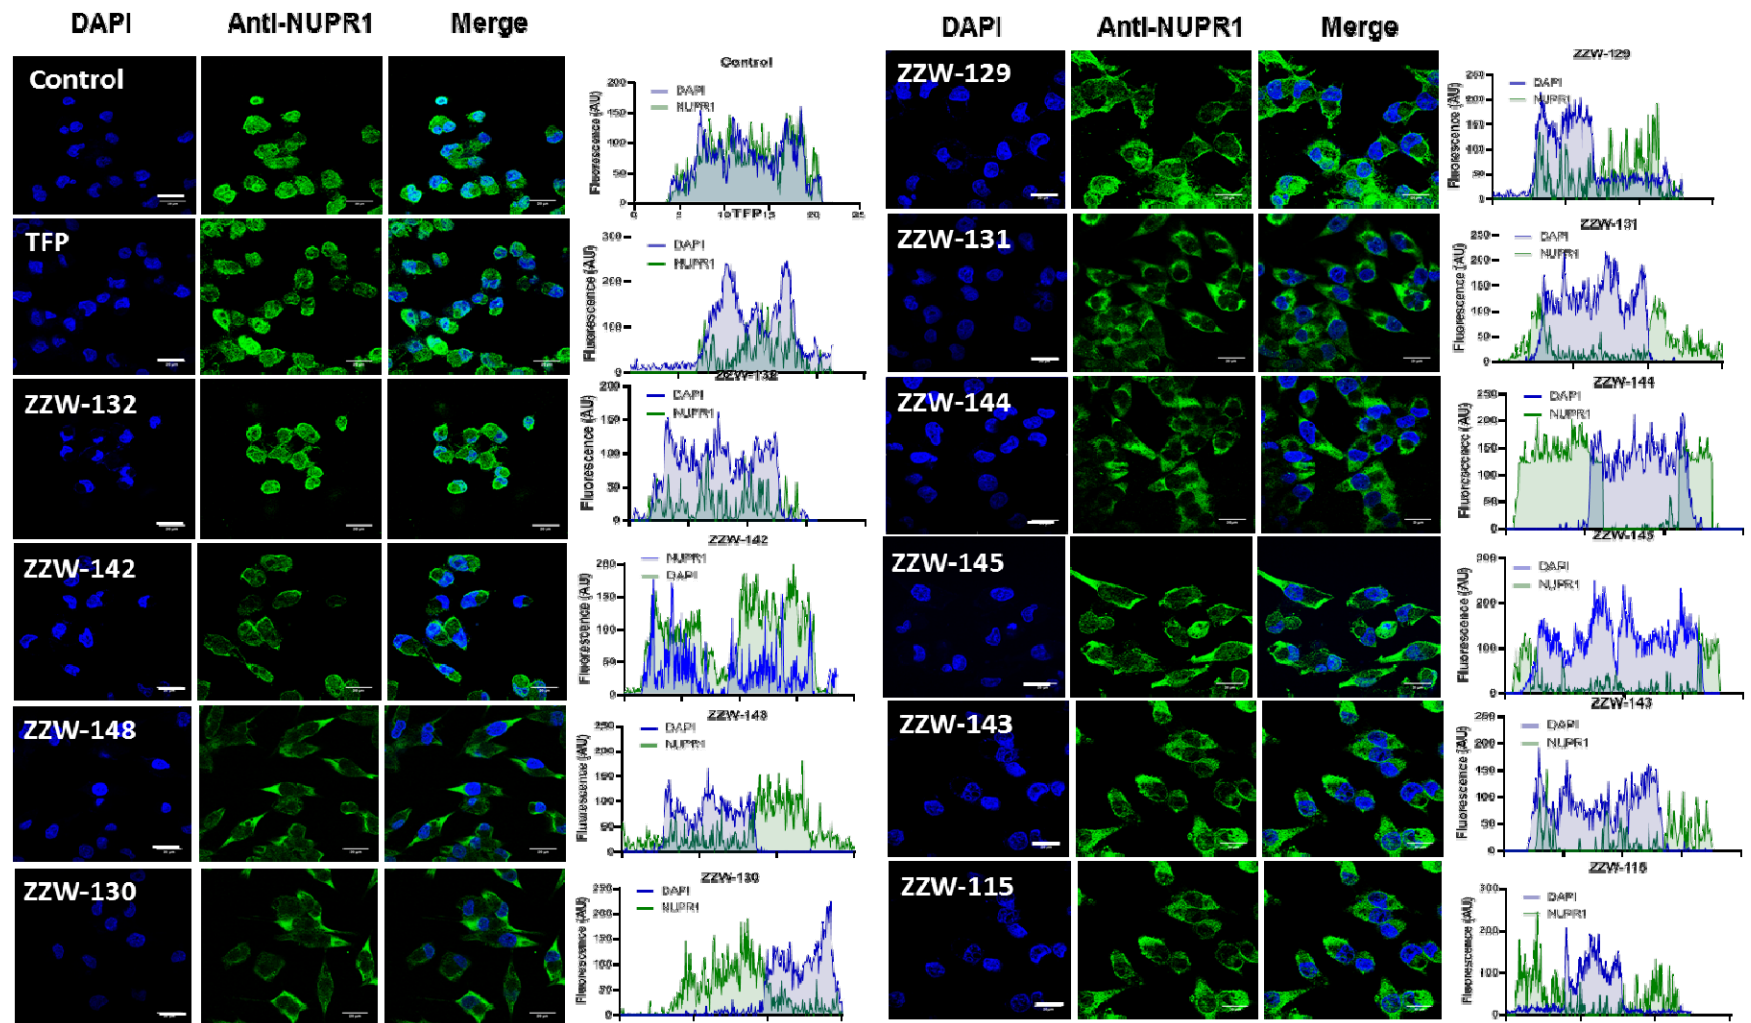

**Figure S1:** Colocalization scatter plots of NUPR1; Pearson's R value (PRV), and Mander's coefficient (MC) were calculated by using the ImageJ Coloc2 plugin. The bar indicates 20  $\mu\text{m}$ .

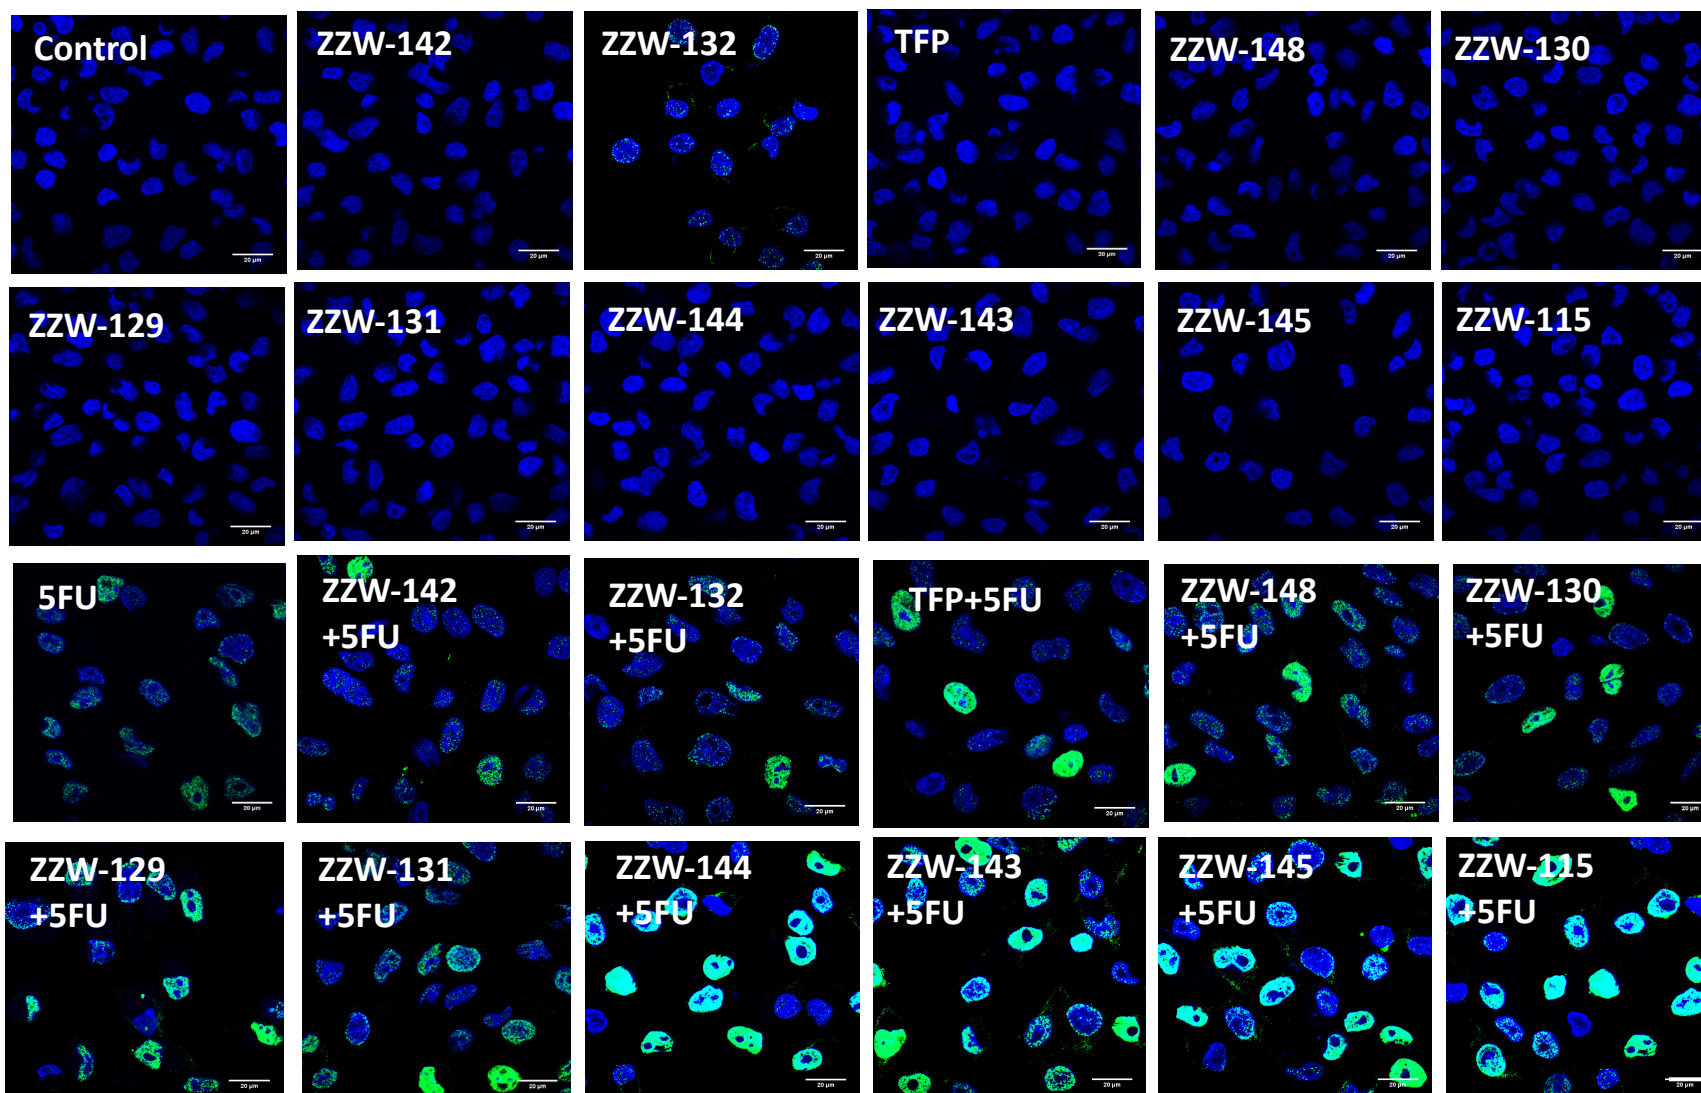

**Figure S2:** Intensity profiles shown for the effect of the ZZW-derived compounds for the ability to sensitize 5-FU induced damage. The bar indicates 20 µm.



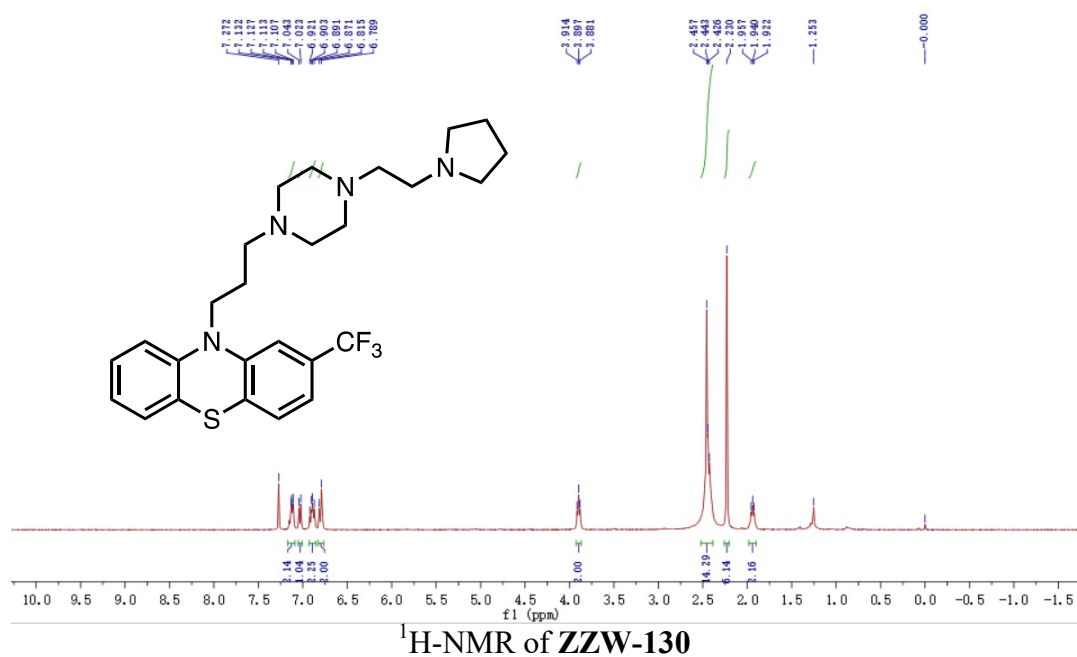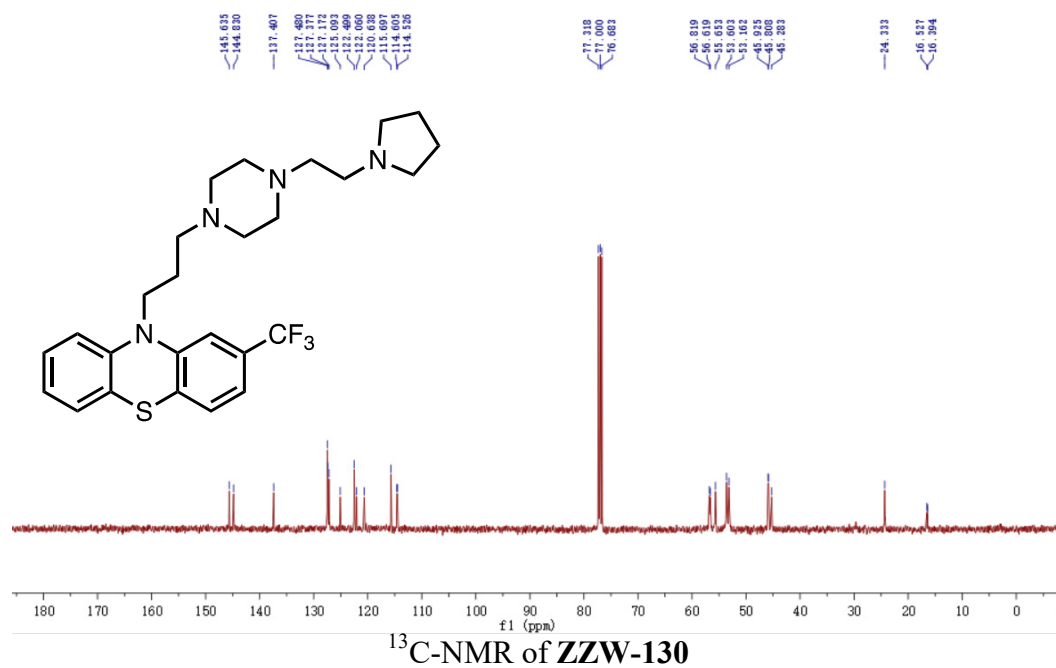

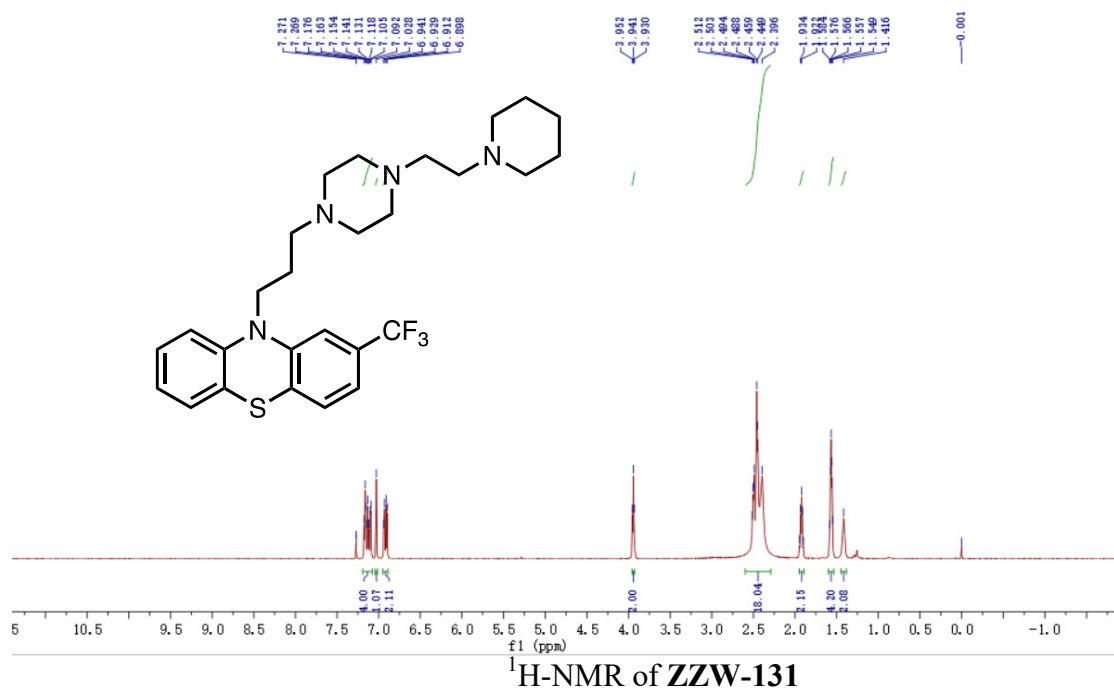





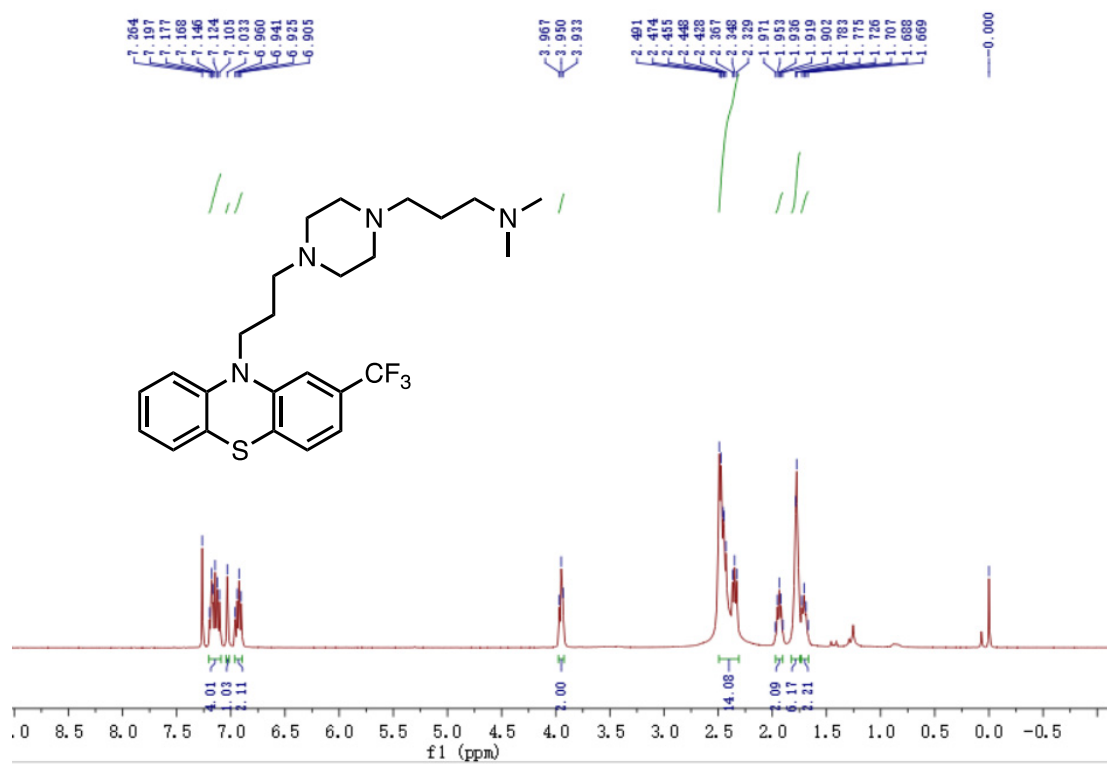

<sup>1</sup>H-NMR of ZZW-142

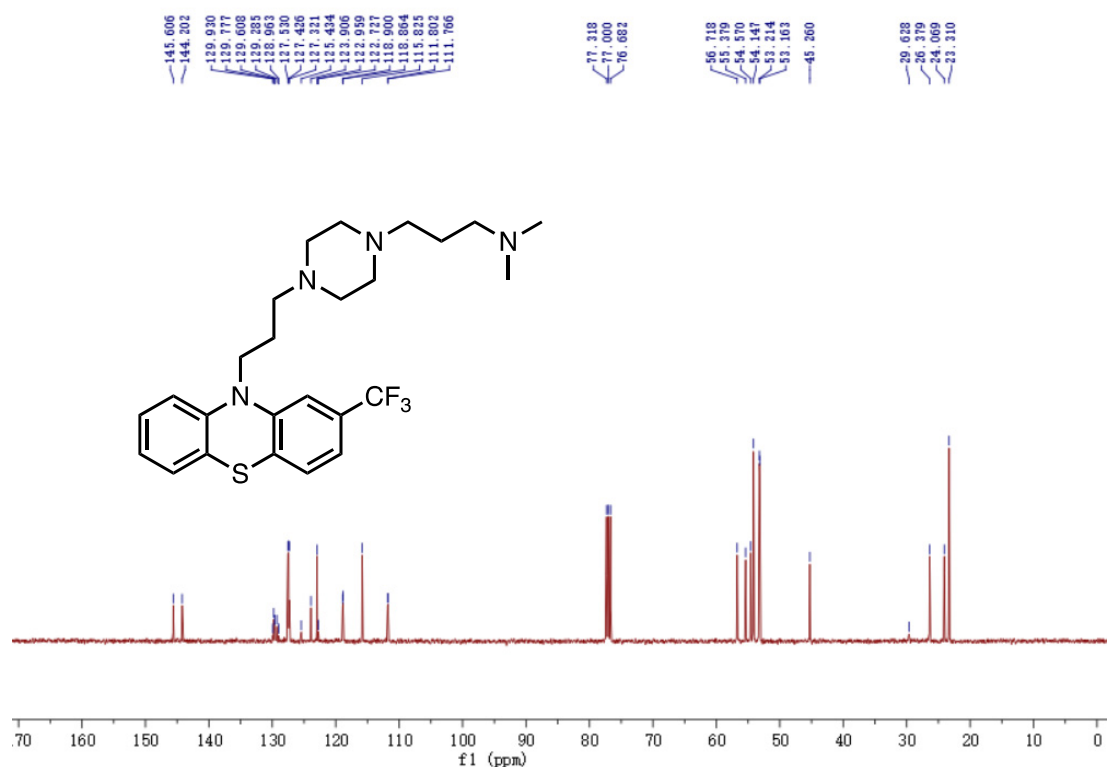

<sup>13</sup>C-NMR of ZZW-142

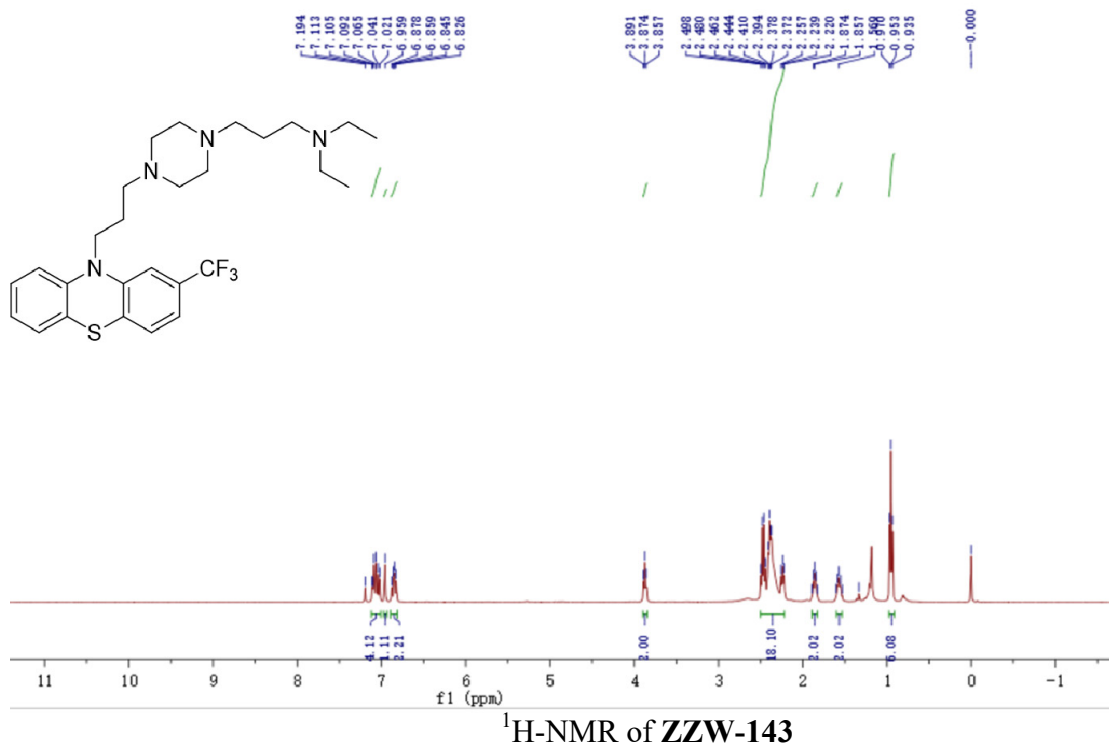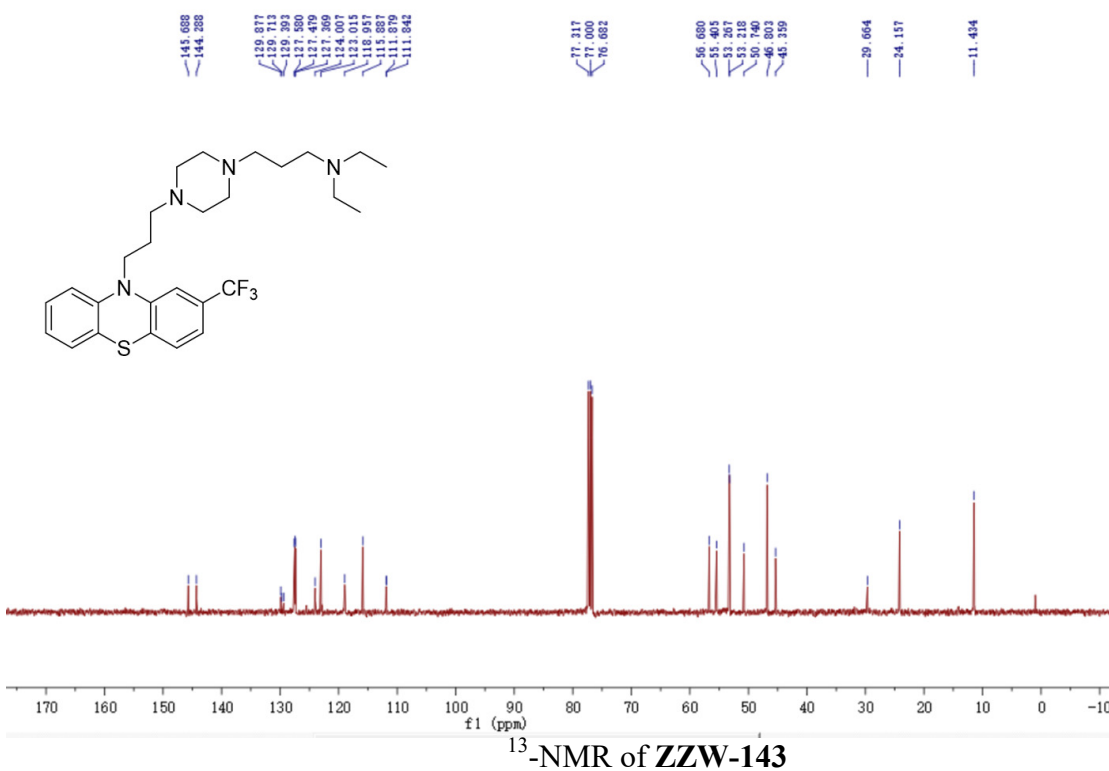

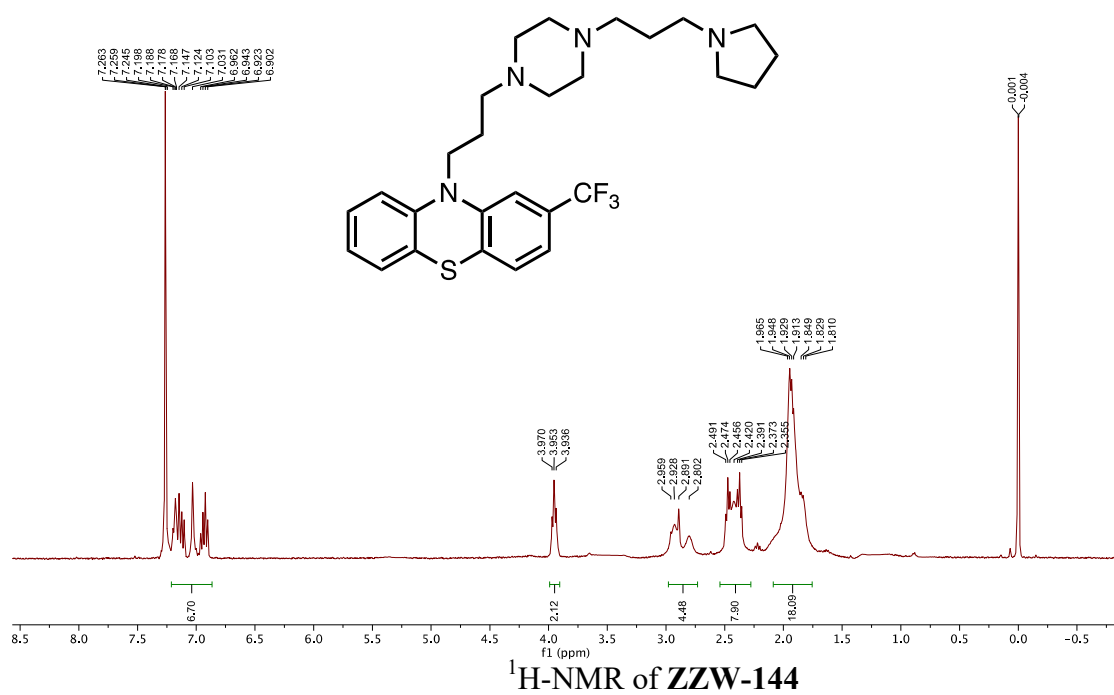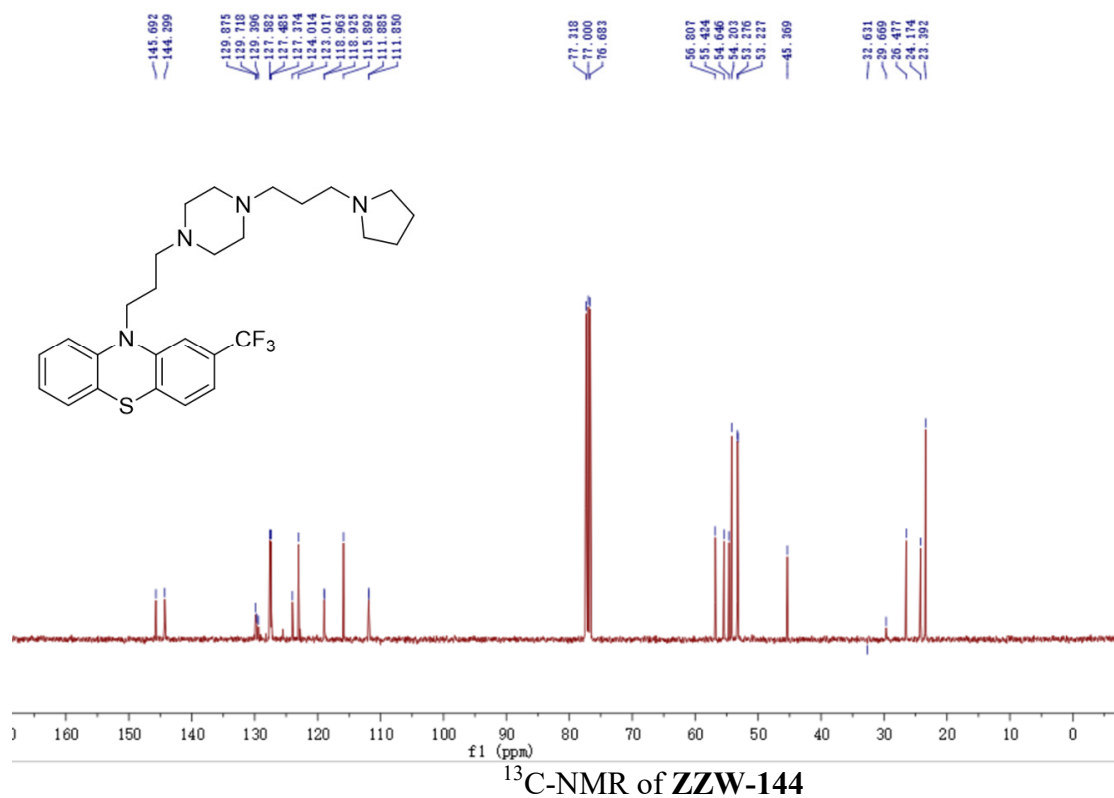

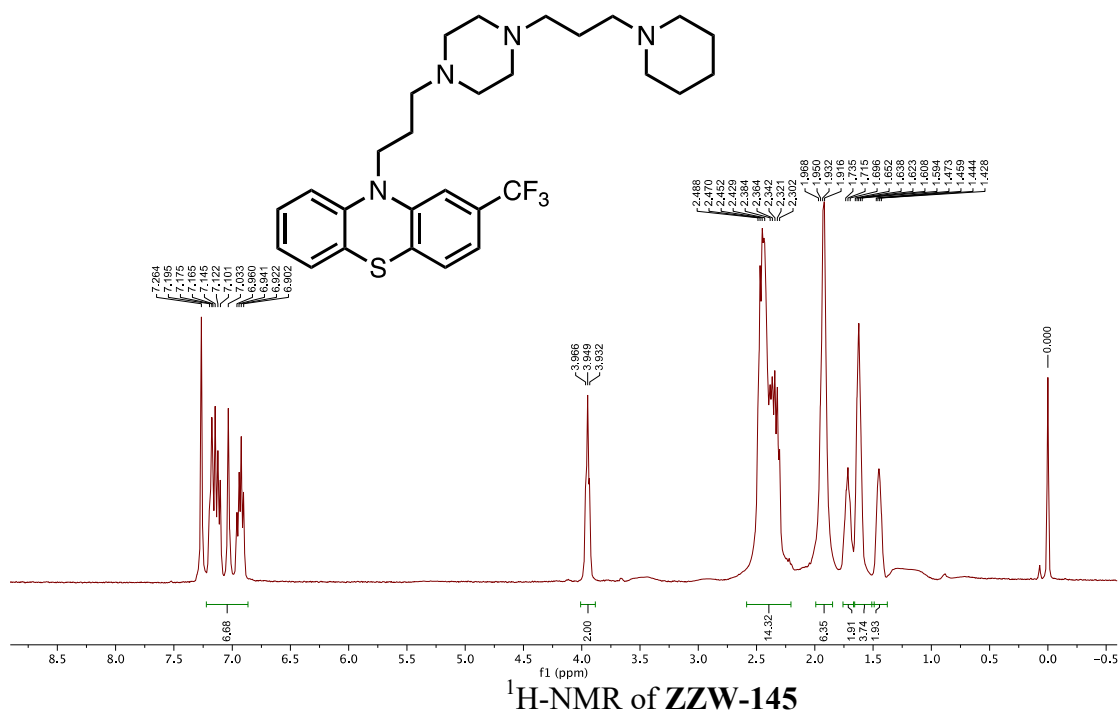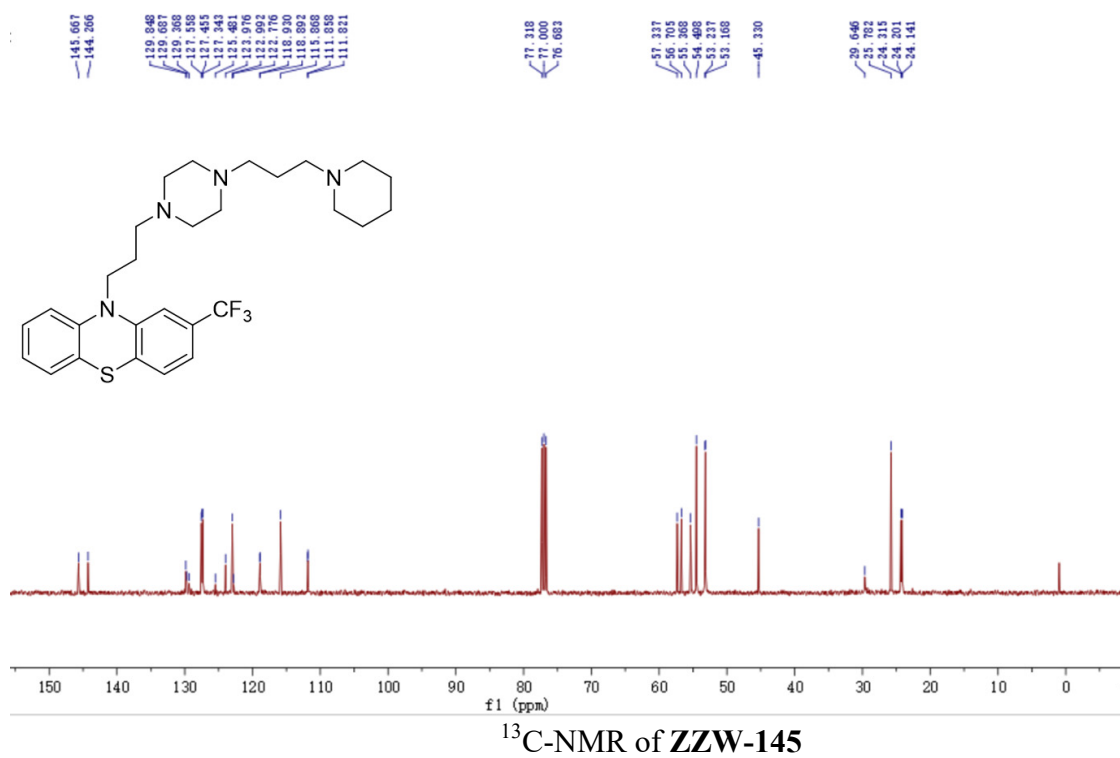

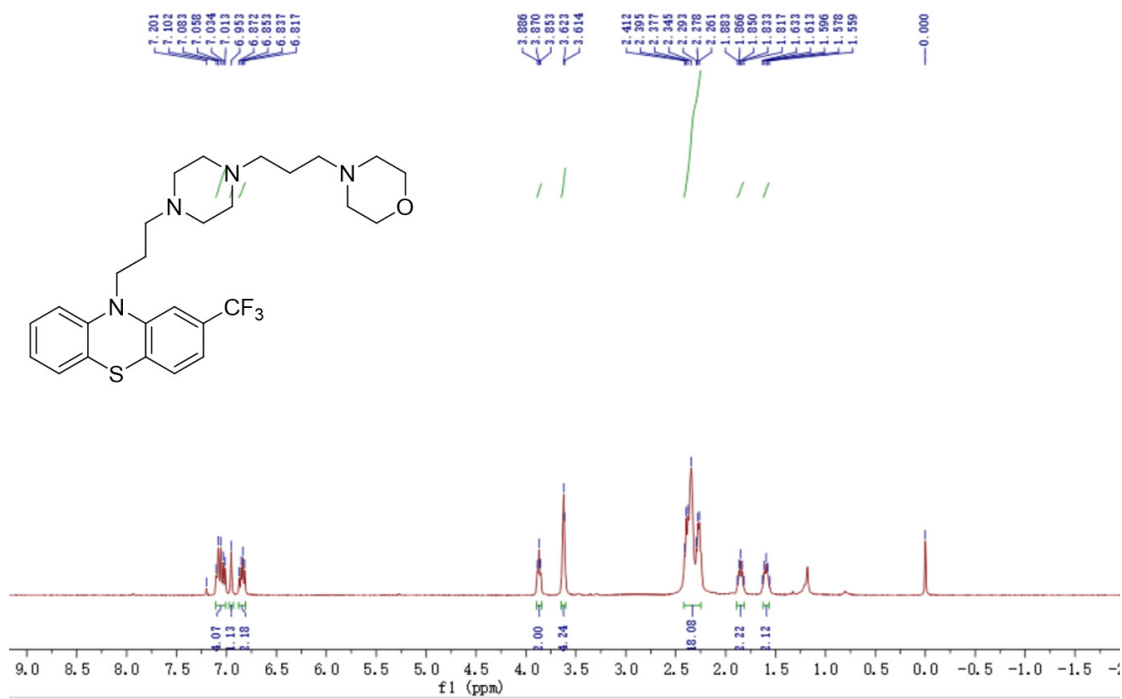

<sup>1</sup>H-NMR of ZZW-148

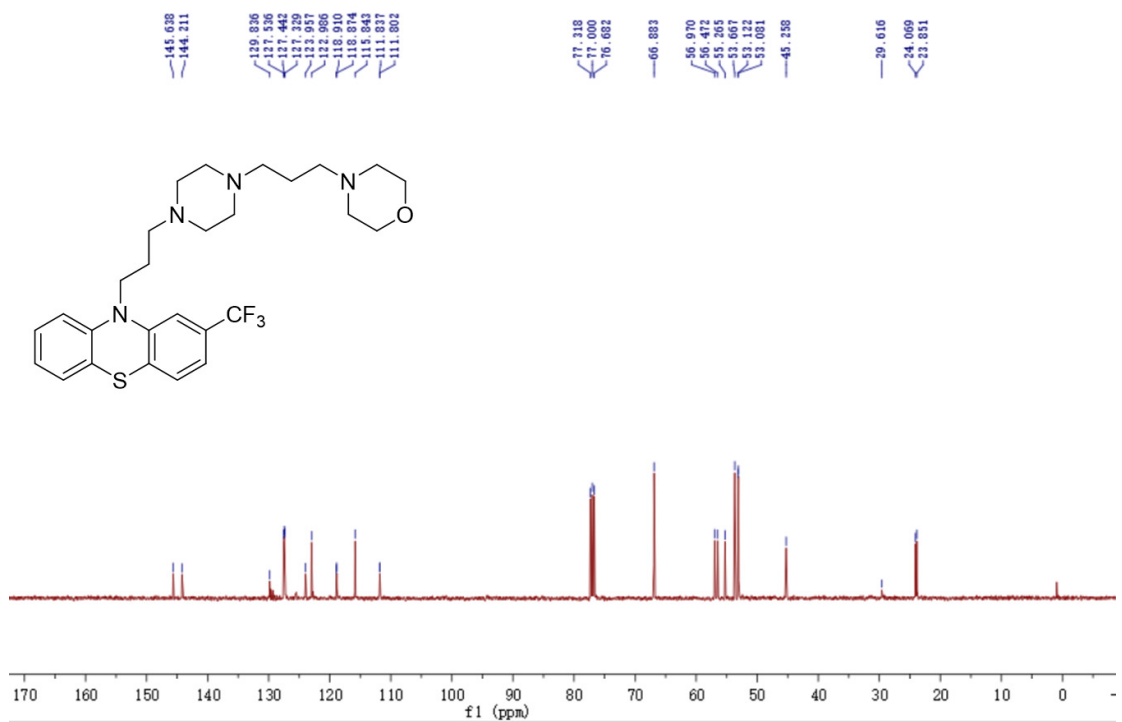

<sup>13</sup>C-NMR of ZZW-148

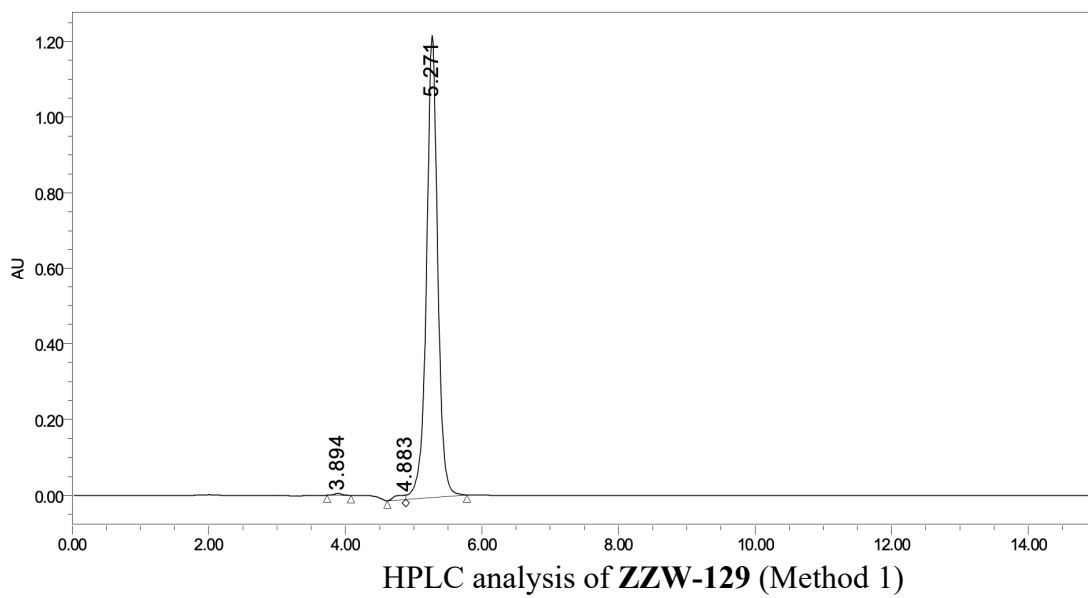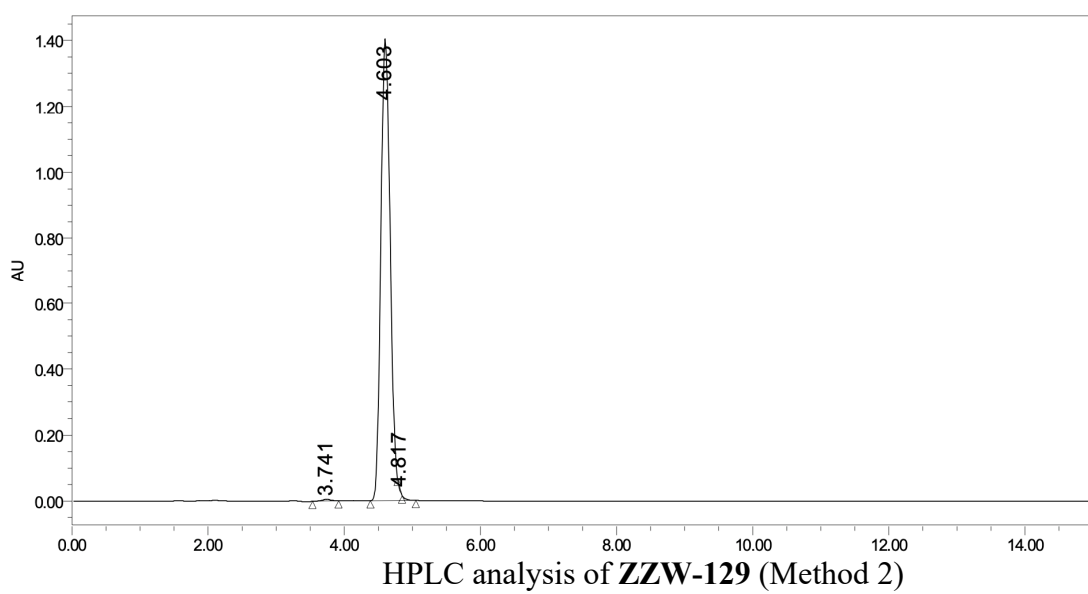

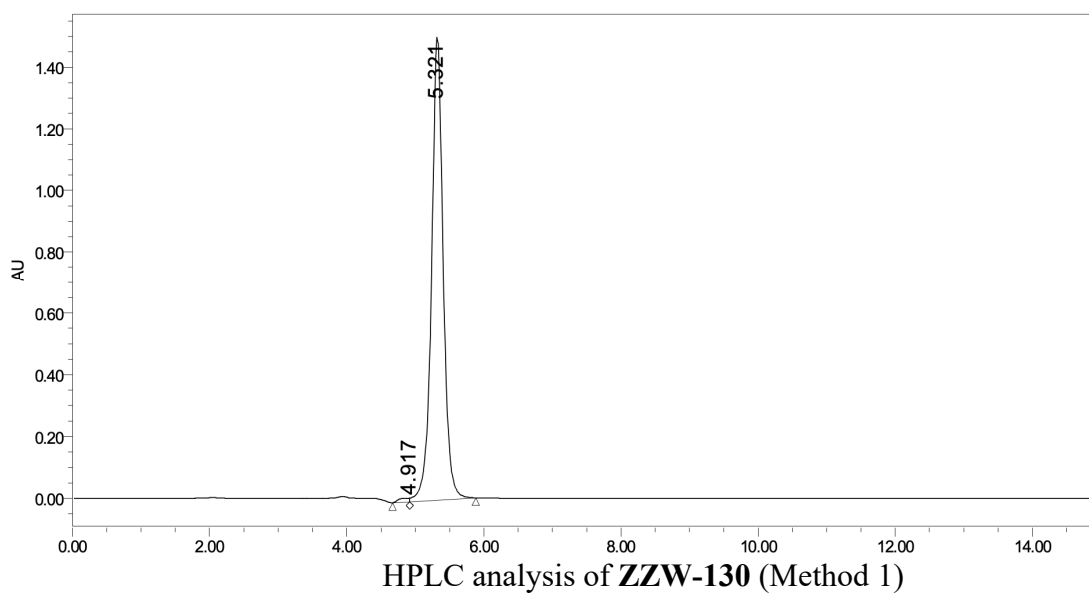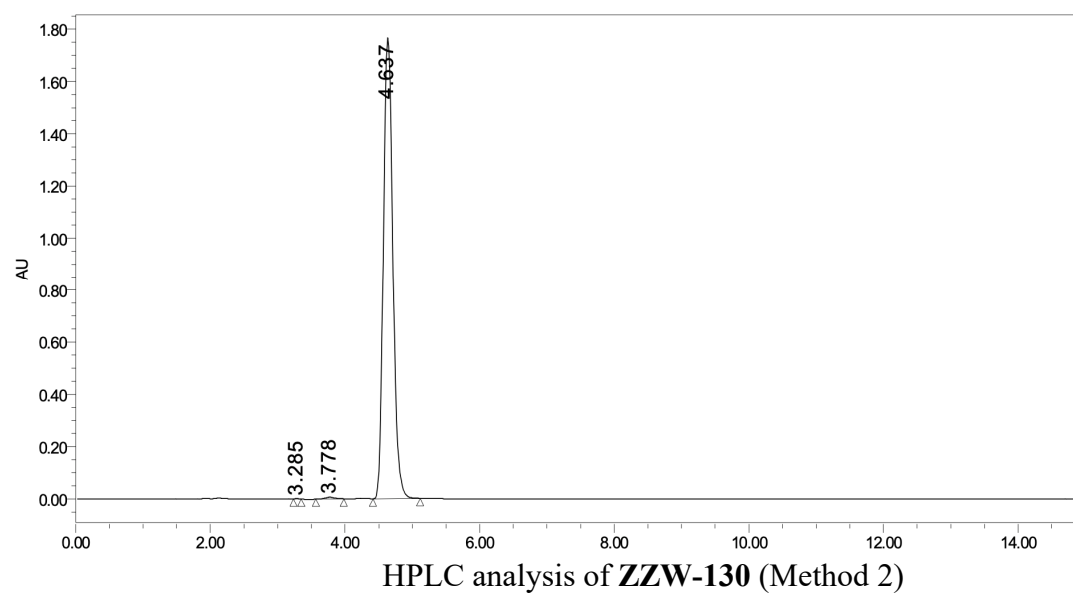

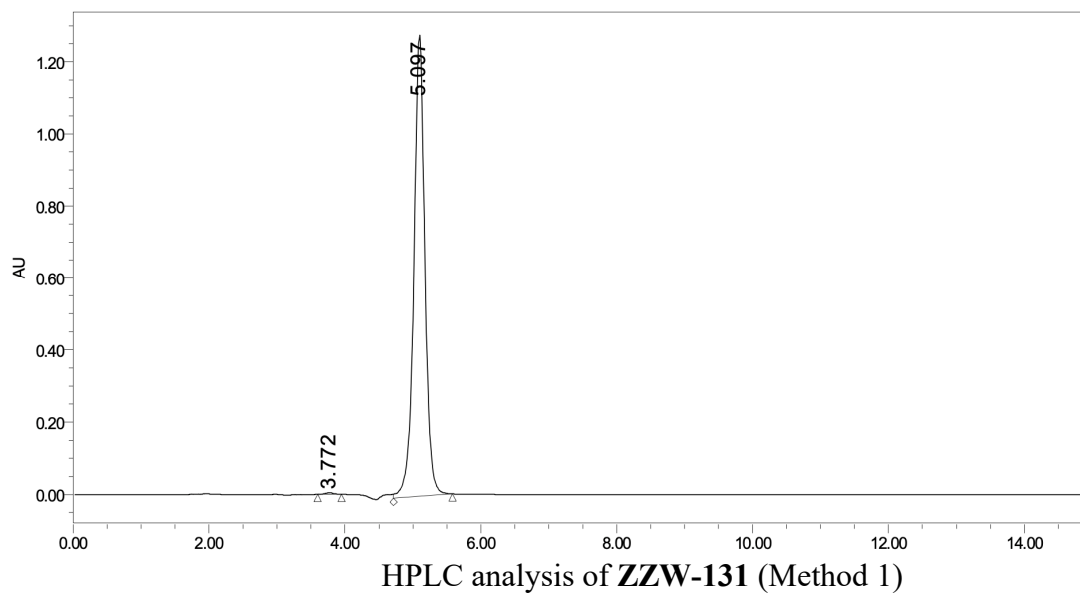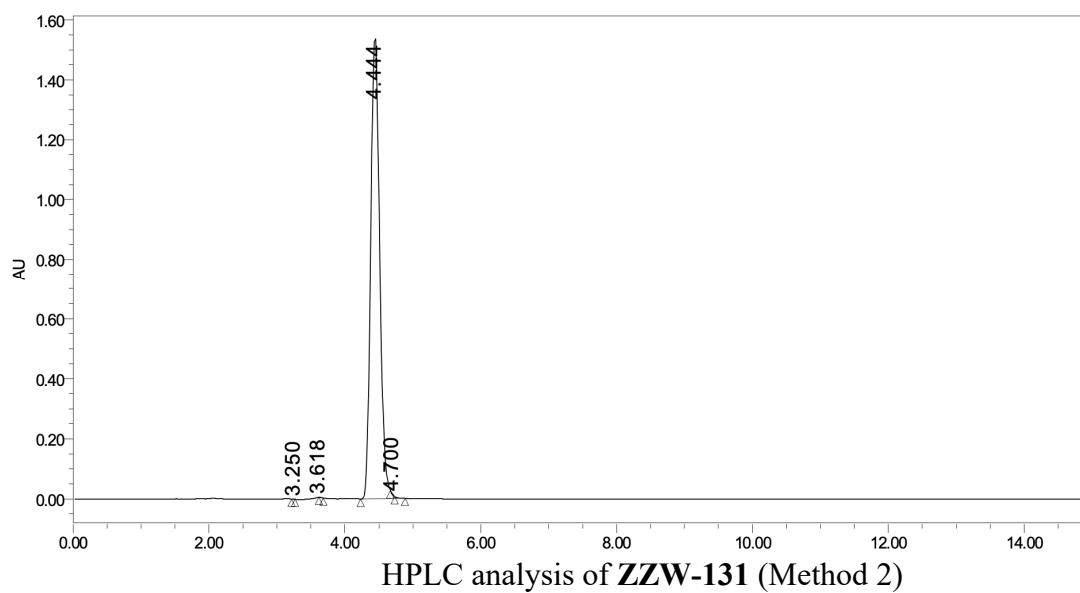



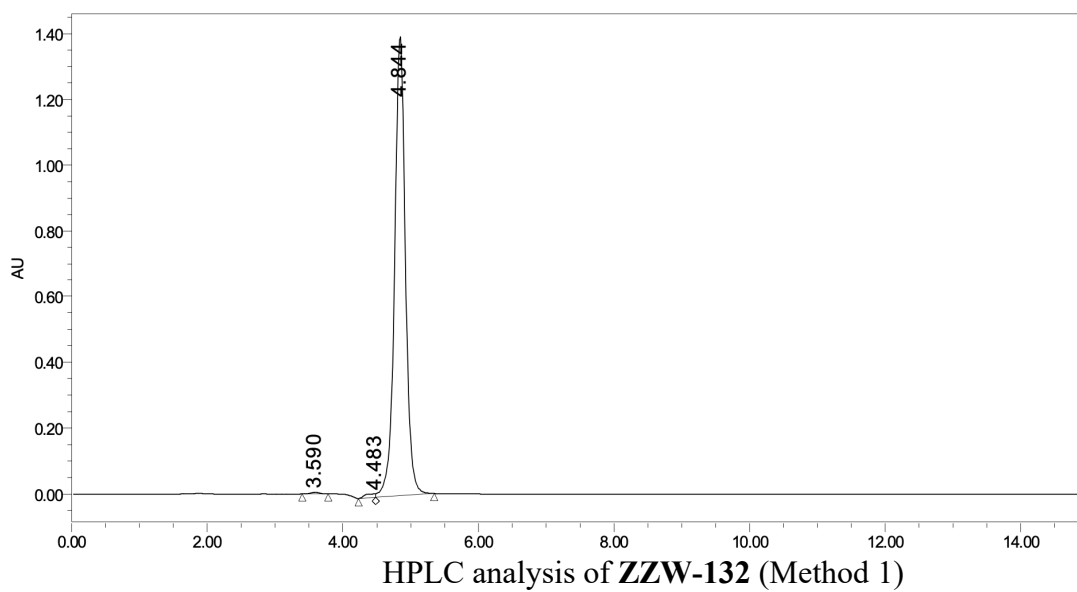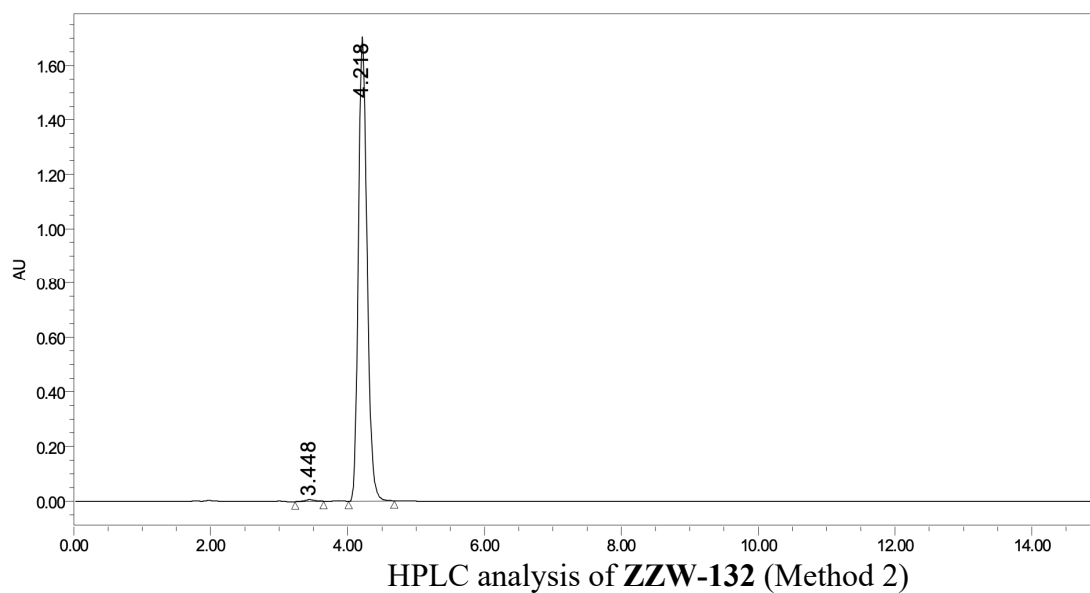

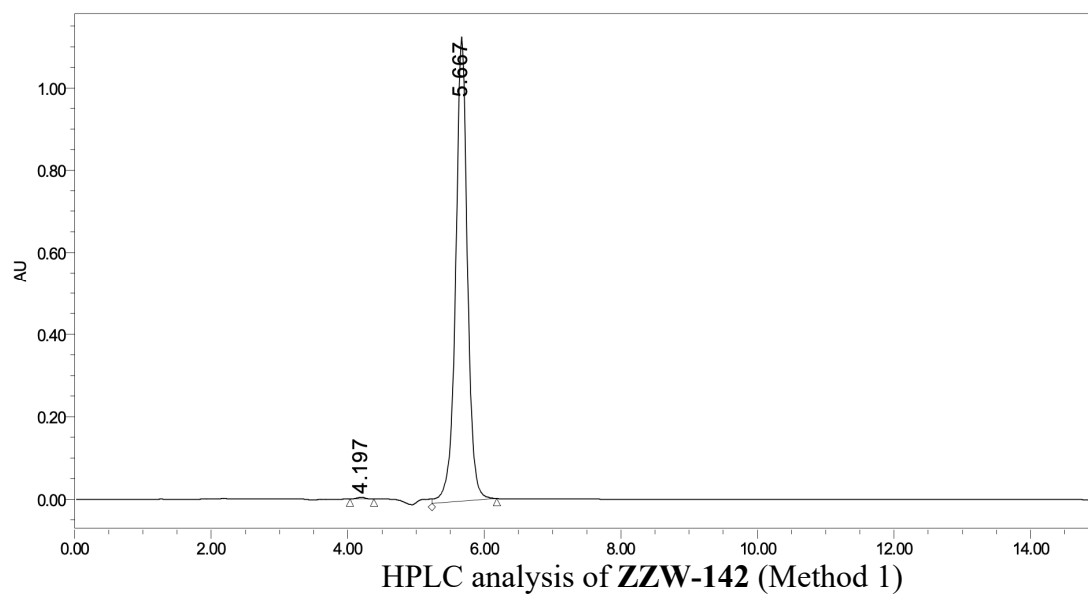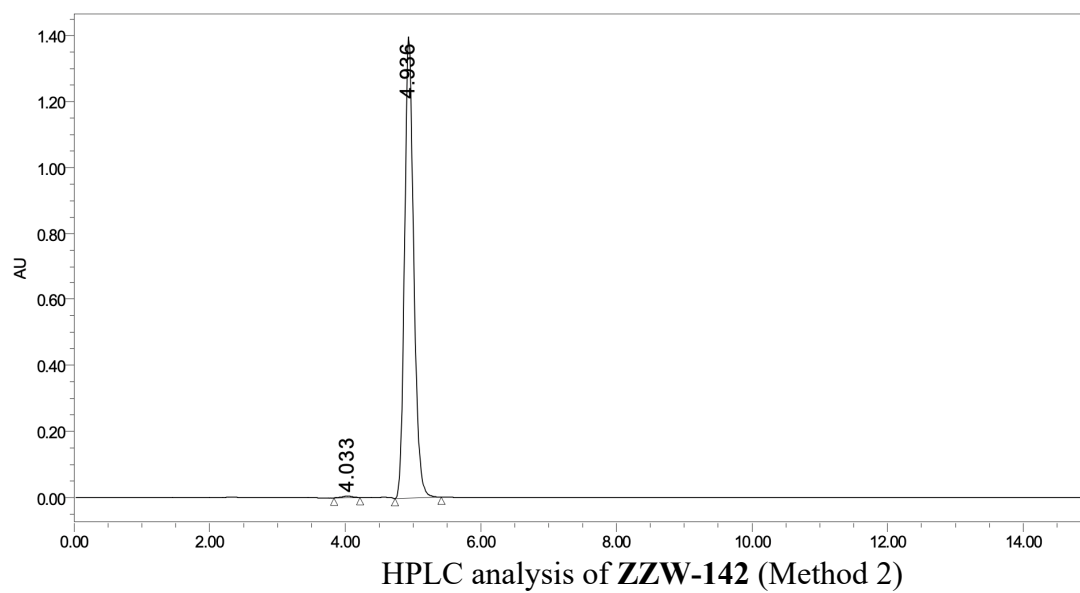

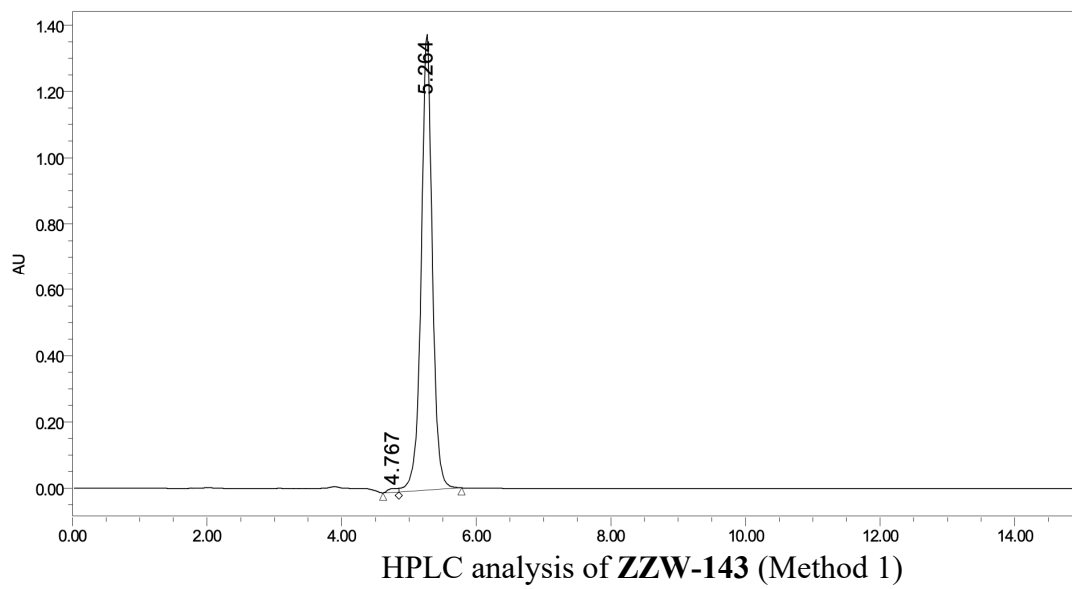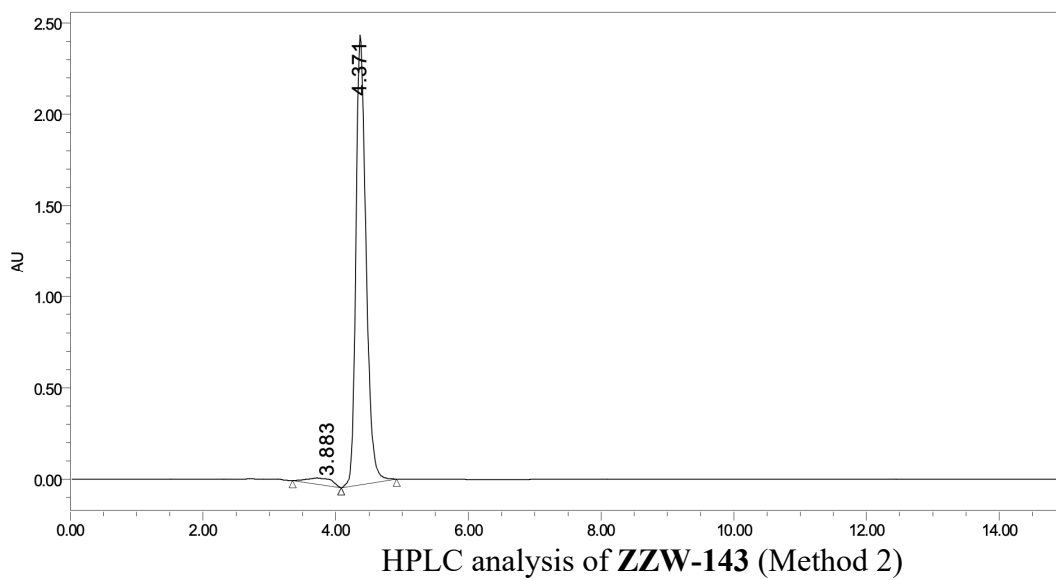

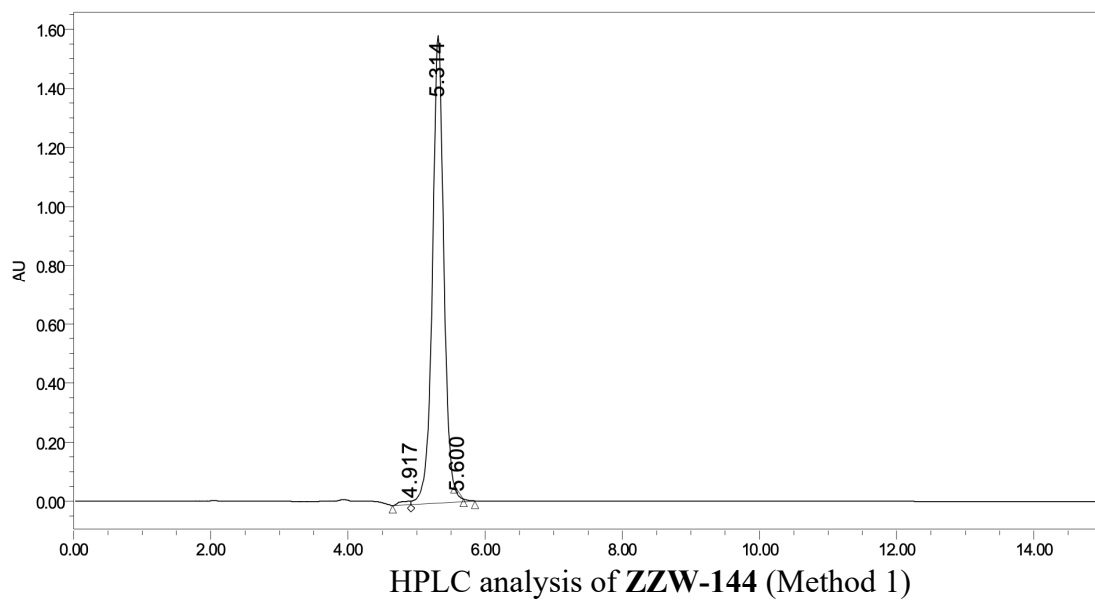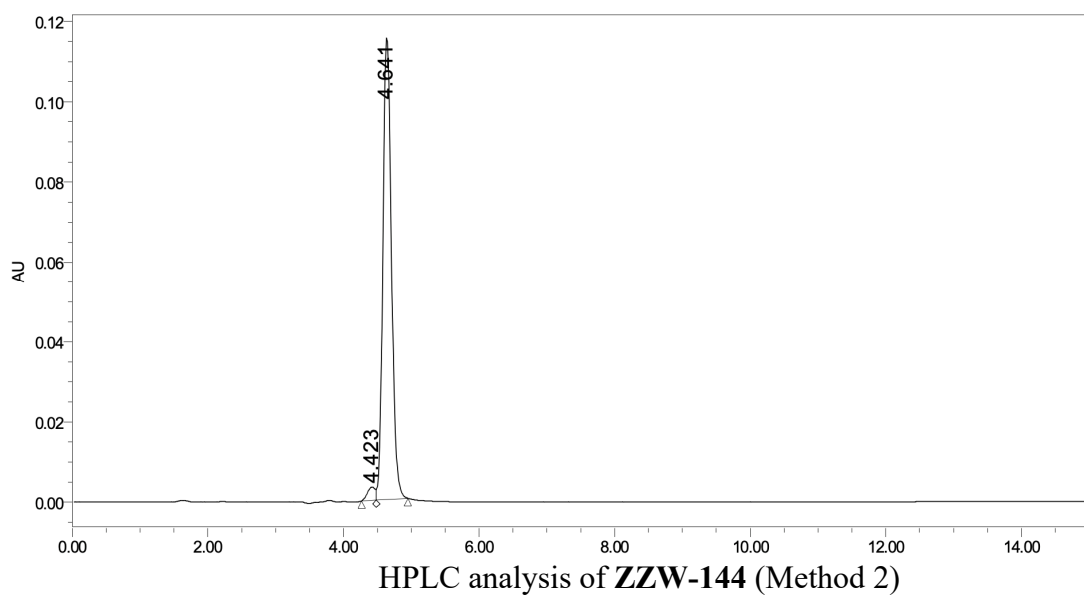

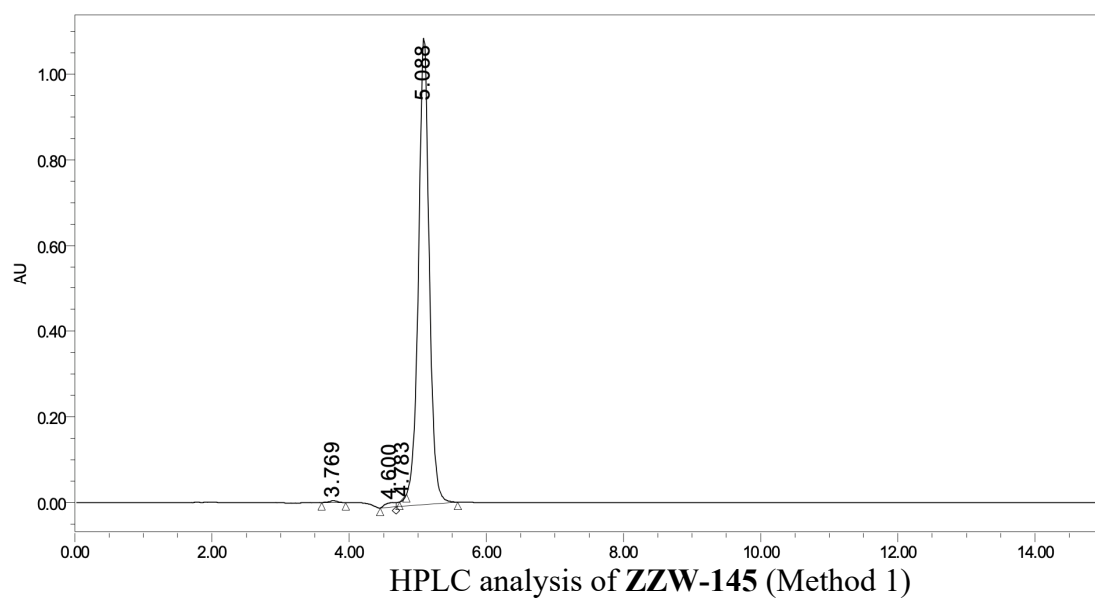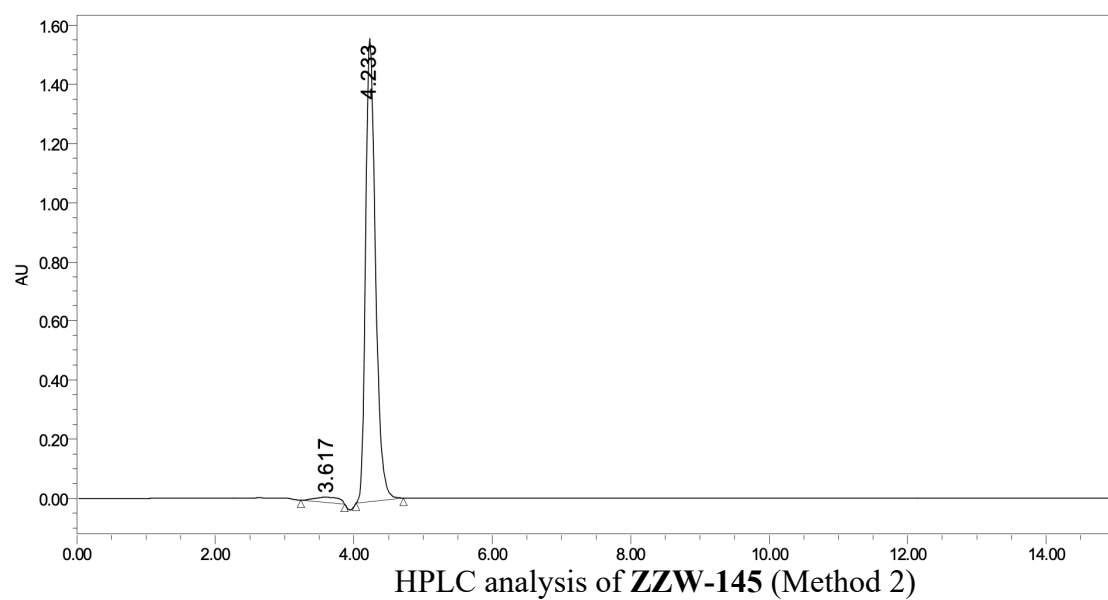

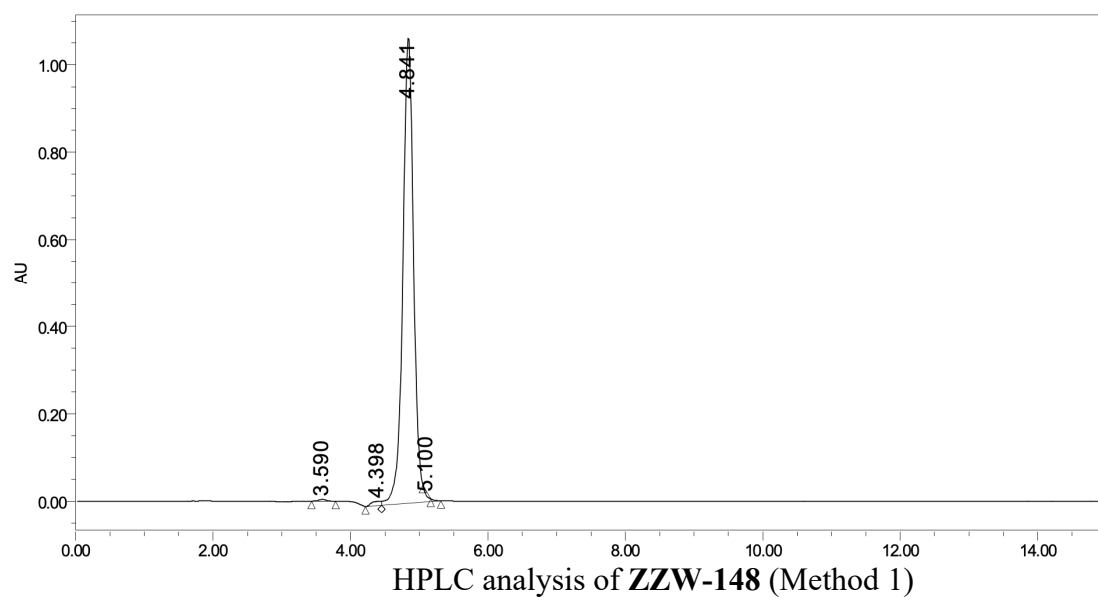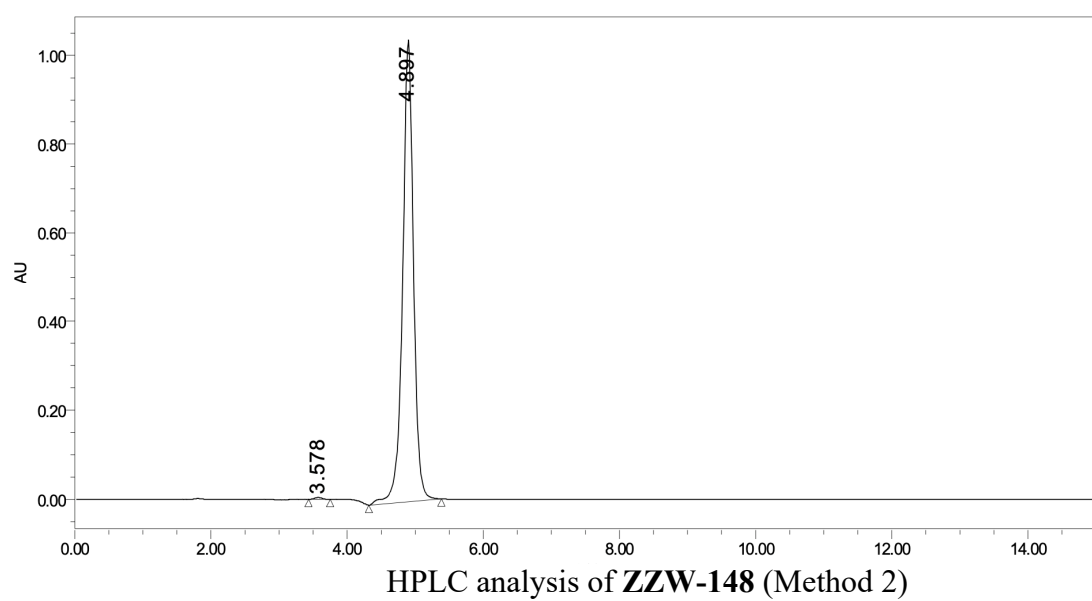

Supplement: s1 [file s1]
